# Supplementary material for: Modeling of Longitudinal Changes in Left Ventricular Dimensions among Female Adolescent Runners
Source: PubMed Central journal article supplement (PMC4607476; doi:10.1371/journal.pone.0140573), 2015-10-15
Supplement: pone.0140573.s001.pdf [file pone.0140573.s001.pdf]

**S1 Table. Multilevel analyses of linear and quadratic models to predict changes in left ventricular (LV) dimensions (model-1 and -2) with chi-square ( $\chi^2$ ) tests for model comparison.**

|                                                       | <i>b</i> | SE <sub><i>b</i></sub> | 95% CI           | Type III test                   | -2LL<br>(parameters) | Change in -2LL (model 1<br>vs. 2) for $\chi^2$ test ( <i>df</i> , N) |
|-------------------------------------------------------|----------|------------------------|------------------|---------------------------------|----------------------|----------------------------------------------------------------------|
| <b>LV end-diastolic dimension : model-1 (linear)</b>  |          |                        |                  |                                 |                      |                                                                      |
| intercept                                             | 47.719   | 0.518                  | 46.682, 48.758   | $F(1, 57.264) = 8477.130^*$     | 603.628              |                                                                      |
| T <sub>measure</sub>                                  | 0.486    | 0.122                  | 0.240, 0.731     | $F(1, 47.365) = 15.834^*$       | (5)                  |                                                                      |
| <b>: model-2 (quadratic)</b>                          |          |                        |                  |                                 |                      |                                                                      |
| intercept                                             | 47.339   | 0.544                  | 46.252, 48.425   | $F(1, 70.652) = 7550.185^*$     |                      |                                                                      |
| T <sub>measure</sub>                                  | 1.186    | 0.346                  | 0.497, 1.874     | $F(1, 87.270) = 11.722^*$       | 599.077              | 4.551 <sup>†</sup>                                                   |
| T <sub>measure</sub> <sup>2</sup>                     | -0.152   | 0.070                  | -0.292, -0.012   | $F(1, 87.649) = 4.679^\dagger$  | (6)                  | ( <i>df</i> = 1, N = 131)                                            |
| <b>LV septal wall thickness : model-1 (linear)</b>    |          |                        |                  |                                 |                      |                                                                      |
| intercept                                             | 7.950    | 0.121                  | 7.708, 8.190     | $F(1, 79.667) = 4303.597^*$     | 267.767              |                                                                      |
| T <sub>measure</sub>                                  | 0.115    | 0.039                  | 0.038, 0.194     | $F(1, 49.884) = 8.923^\dagger$  | (5)                  |                                                                      |
| <b>: model-2 (quadratic)</b>                          |          |                        |                  |                                 |                      |                                                                      |
| intercept                                             | 7.856    | 0.132                  | 7.595, 8.117     | $F(1, 107.111) = 3558.290^*$    |                      |                                                                      |
| T <sub>measure</sub>                                  | 0.300    | 0.109                  | 0.082, 0.518     | $F(1, 89.451) = 7.509^\ddagger$ | 264.637              | 3.130                                                                |
| T <sub>measure</sub> <sup>2</sup>                     | -0.041   | 0.022                  | -0.085, 0.003    | $F(1, 89.786) = 3.374$          | (6)                  | ( <i>df</i> = 1, N = 131)                                            |
| <b>LV posterior wall thickness : model-1 (linear)</b> |          |                        |                  |                                 |                      |                                                                      |
| intercept                                             | 8.178    | 0.110                  | 7.958, 8.398     | $F(1, 70.902) = 5488.720^*$     | 223.685              |                                                                      |
| T <sub>measure</sub>                                  | 0.085    | 0.033                  | 0.018, 0.152     | $F(1, 39.610) = 6.638^\dagger$  | (5)                  |                                                                      |
| <b>: model-2 (quadratic)</b>                          |          |                        |                  |                                 |                      |                                                                      |
| intercept                                             | 8.081    | 0.117                  | 7.848, 8.313     | $F(1, 94.336) = 4763.399^*$     |                      |                                                                      |
| T <sub>measure</sub>                                  | 0.277    | 0.089                  | 0.100, 0.453     | $F(1, 92.178) = 9.651^\S$       | 218.534              | 5.151 <sup>†</sup>                                                   |
| T <sub>measure</sub> <sup>2</sup>                     | -0.042   | 0.018                  | -0.077, -0.006   | $F(1, 95.387) = 5.313^\dagger$  | (6)                  | ( <i>df</i> = 1, N = 131)                                            |
| <b>LV mass : model-1 (linear)</b>                     |          |                        |                  |                                 |                      |                                                                      |
| intercept                                             | 127.219  | 2.991                  | 121.241, 133.196 | $F(1, 62.823) = 1809.249^*$     | 1082.599             |                                                                      |
| T <sub>measure</sub>                                  | 4.383    | 0.781                  | 2.803, 5.964     | $F(1, 38.416) = 31.504^*$       | (5)                  |                                                                      |
| <b>: model-2 (quadratic)</b>                          |          |                        |                  |                                 |                      |                                                                      |
| intercept                                             | 123.225  | 3.123                  | 117.008, 129.443 | $F(1, 77.808) = 1556.850^*$     |                      |                                                                      |
| T <sub>measure</sub>                                  | 11.632   | 2.128                  | 7.401, 15.863    | $F(1, 79.410) = 29.941^*$       | 1070.193             | 12.406 <sup>¶</sup>                                                  |
| T <sub>measure</sub> <sup>2</sup>                     | -1.575   | 0.432                  | -2.435, -0.715   | $F(1, 77.536) = 13.300^*$       | (6)                  | ( <i>df</i> = 1, N = 131)                                            |

\*  $p < 0.001$ , §  $p < 0.005$ , ¶  $p < 0.01$ , †  $p < 0.05$ . N: total number of measurements, b: unadjusted regression coefficient, SE<sub>*b*</sub>: standard error of coefficient, CI: confidence interval, -2LL: minus twice the log-likelihood. Occasion of measurement (T<sub>measure</sub>) is numbered from 0 (baseline) to 5 with a 1-unit increase representing 6 months. All parameter estimates are unstandardized regression coefficients.

$\chi^2$  statistics were calculated by subtracting the -2LL of model-2 from that of model-1. Degrees of freedom (*df*) for  $\chi^2$  tests were calculated by subtracting the number of parameters in model-1 from that in model-2.
