# Supplementary material for: Modeling of Longitudinal Changes in Left Ventricular Dimensions among Female Adolescent Runners
Source: PubMed Central journal article supplement (PMC4607476; doi:10.1371/journal.pone.0140573), 2015-10-15
Supplement: pone.0140573.s002.pdf [file pone.0140573.s002.pdf]

**S2 Table. Multilevel analyses of linear and quadratic models adjusted for fat free mass (FFM) to predict changes in left ventricular (LV) dimensions (model-3 and -4) with chi-square ( $\chi^2$ ) tests for model comparison.**

|                                                       | <i>b</i> | SE <sub><i>b</i></sub> | 95% CI         | Type III test              | -2LL<br>(parameters) | Change in -2LL (model 3<br>vs. 4) for $\chi^2$ test ( <i>df</i> , N) |
|-------------------------------------------------------|----------|------------------------|----------------|----------------------------|----------------------|----------------------------------------------------------------------|
| <b>LV end-diastolic dimension : model-3 (linear)</b>  |          |                        |                |                            |                      |                                                                      |
| intercept                                             | 31.738   | 3.377                  | 24.986, 38.490 | $F(1, 61.384) = 88.327 *$  |                      |                                                                      |
| T <sub>measure</sub>                                  | 0.241    | 0.125                  | -0.010, 0.491  | $F(1, 60.820) = 3.689$     | 582.714              |                                                                      |
| FFM                                                   | 0.419    | 0.088                  | 0.243, 0.594   | $F(1, 62.075) = 22.821 *$  | (6)                  |                                                                      |
| <b>: model-4 (quadratic)</b>                          |          |                        |                |                            |                      |                                                                      |
| intercept                                             | 32.487   | 3.411                  | 25.657, 39.317 | $F(1, 56.847) = 90.729 *$  |                      |                                                                      |
| T <sub>measure</sub>                                  | 0.636    | 0.353                  | -0.063, 1.336  | $F(1, 100.398) = 3.256$    |                      |                                                                      |
| T <sub>measure</sub> <sup>2</sup>                     | -0.083   | 0.069                  | -0.219, 0.054  | $F(1, 92.694) = 1.447$     | 581.285              | 1.429                                                                |
| FFM                                                   | 0.394    | 0.089                  | 0.214, 0.573   | $F(1, 57.278) = 19.348 *$  | (7)                  | ( <i>df</i> = 1, N = 131)                                            |
| <b>LV septal wall thickness : model-3 (linear)</b>    |          |                        |                |                            |                      |                                                                      |
| intercept                                             | 7.191    | 0.800                  | 5.585, 8.800   | $F(1, 49.530) = 80.865 *$  |                      |                                                                      |
| T <sub>measure</sub>                                  | 0.103    | 0.041                  | 0.021, 0.184   | $F(1, 55.358) = 6.338 †$   | 266.856              |                                                                      |
| FFM                                                   | 0.020    | 0.021                  | -0.022, 0.062  | $F(1, 50.016) = 0.919$     | (6)                  |                                                                      |
| <b>: model-4 (quadratic)</b>                          |          |                        |                |                            |                      |                                                                      |
| intercept                                             | 7.317    | 0.804                  | 5.701, 8.933   | $F(1, 48.295) = 82.868 *$  |                      |                                                                      |
| T <sub>measure</sub>                                  | 0.279    | 0.114                  | 0.053, 0.504   | $F(1, 96.804) = 6.011 †$   |                      |                                                                      |
| T <sub>measure</sub> <sup>2</sup>                     | -0.038   | 0.023                  | -0.083, 0.007  | $F(1, 93.079) = 2.873$     | 264.177              | 2.679                                                                |
| FFM                                                   | 0.014    | 0.021                  | -0.028, 0.057  | $F(1, 48.389) = 0.462$     | (7)                  | ( <i>df</i> = 1, N = 131)                                            |
| <b>LV posterior wall thickness : model-3 (linear)</b> |          |                        |                |                            |                      |                                                                      |
| intercept                                             | 7.489    | 0.753                  | 5.980, 8.998   | $F(1, 58.178) = 98.846 *$  |                      |                                                                      |
| T <sub>measure</sub>                                  | 0.074    | 0.035                  | 0.003, 0.145   | $F(1, 45.732) = 4.409 †$   | 222.836              |                                                                      |
| FFM                                                   | 0.018    | 0.020                  | -0.021, 0.057  | $F(1, 56.727) = 0.853$     | (6)                  |                                                                      |
| <b>: model-4 (quadratic)</b>                          |          |                        |                |                            |                      |                                                                      |
| intercept                                             | 7.709    | 0.758                  | 6.188, 9.229   | $F(1, 54.016) = 103.359 *$ |                      |                                                                      |
| T <sub>measure</sub>                                  | 0.262    | 0.094                  | 0.076, 0.448   | $F(1, 101.675) = 7.828 †$  |                      |                                                                      |
| T <sub>measure</sub> <sup>2</sup>                     | -0.040   | 0.018                  | -0.076, -0.003 | $F(1, 100.038) = 4.669 †$  | 218.289              | 4.547 †                                                              |
| FFM                                                   | 0.010    | 0.020                  | -0.030, 0.050  | $F(1, 54.317) = 0.246$     | (7)                  | ( <i>df</i> = 1, N = 131)                                            |
| <b>LV mass : model-3 (linear)</b>                     |          |                        |                |                            |                      |                                                                      |
| intercept                                             | 35.073   | 19.767                 | -4.559, 74.705 | $F(1, 53.880) = 3.148$     |                      |                                                                      |
| T <sub>measure</sub>                                  | 2.956    | 0.794                  | 1.358, 4.554   | $F(1, 45.730) = 13.863 *$  | 1062.175             |                                                                      |
| FFM                                                   | 2.415    | 0.513                  | 1.386, 3.444   | $F(1, 54.412) = 22.132 *$  | (6)                  |                                                                      |
| <b>: model-4 (quadratic)</b>                          |          |                        |                |                            |                      |                                                                      |
| intercept                                             | 43.260   | 19.639                 | 3.870, 82.650  | $F(1, 53.066) = 4.852 †$   |                      |                                                                      |
| T <sub>measure</sub>                                  | 8.674    | 2.167                  | 4.369, 12.979  | $F(1, 90.849) = 16.017 *$  |                      |                                                                      |
| T <sub>measure</sub> <sup>2</sup>                     | -1.204   | 0.425                  | -2.049, -0.359 | $F(1, 83.357) = 8.029 †$   | 1054.456             | 7.719 †                                                              |
| FFM                                                   | 2.120    | 0.515                  | 1.087, 3.153   | $F(1, 53.330) = 16.929 *$  | (7)                  | ( <i>df</i> = 1, N = 131)                                            |

\*  $p < 0.001$ , §  $p < 0.005$ , ¶  $p < 0.01$ , †  $p < 0.05$ . N: total number of measurement,  $b$ : unadjusted regression coefficient,  $SE_b$ : standard error of coefficient, CI: confidence interval,  $-2LL$ : minus twice the log-likelihood. Occasion of measurement ( $T_{\text{measure}}$ ) is numbered from 0 (baseline) to 5 with a 1-unit increase representing 6 months. All parameter estimates are unstandardized regression coefficients.

$\chi^2$  statistics were calculated by subtracting the  $-2LL$  of model-4 from that of model-3. Degrees of freedom ( $df$ ) for  $\chi^2$  tests were calculated by subtracting the number of parameter in model-3 from that in model-4.
